# Supplementary material
Source: PubMed Central journal article supplement (PMC4691706)
Supplement: NIHMS745462-supplement-01.pdf [file NIHMS745462-supplement-01.pdf]

DOI: 10.1038/ncb3195

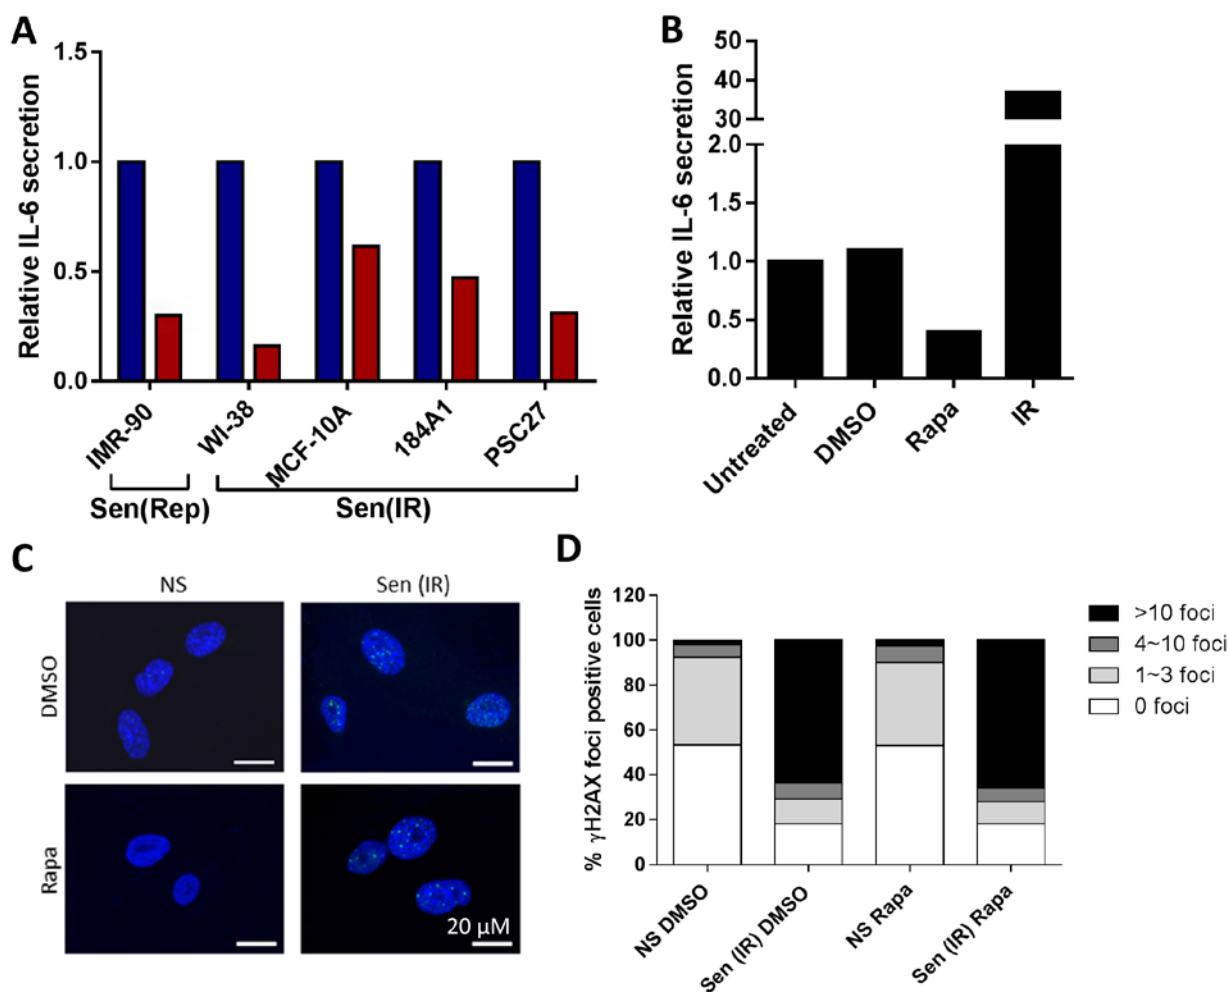

**Supplementary Figure 1** Rapamycin suppresses the SASP in multiple cell strains and lines. (A) IL-6 secretion by IR-induced senescent cells, normalized to replicatively senescent IMR-90 normal fetal lung human fibroblasts. Shown are WI-38 normal fetal lung fibroblasts, MCF10-A and 184A1 immortal human breast epithelial cells and PSC27 normal adult prostate fibroblasts, treated with either DMSO (blue bars) or rapamycin (red bars). (B) We treated non-senescent (NS) HCA2 cells with rapamycin for 6 days, collected CM and analyzed IL-6 by ELISA. IL-6 secretion by irradiated

senescent cells (Sen (IR)) is shown for comparison. (C) Immunofluorescence staining for 53BP1 was compared between NS and senescent (Sen IR) cells treated with DMSO or rapamycin (one representative image is shown). (D) We determined the number of foci in NS or senescent (Sen IR) cells treated with DMSO or rapamycin. With the exception of 184A1 experiment which was performed once, for panels A, B and D, shown is one representative of two or more independent experiments, each with triplicate samples. Raw data could be found in Supplementary Table 4.

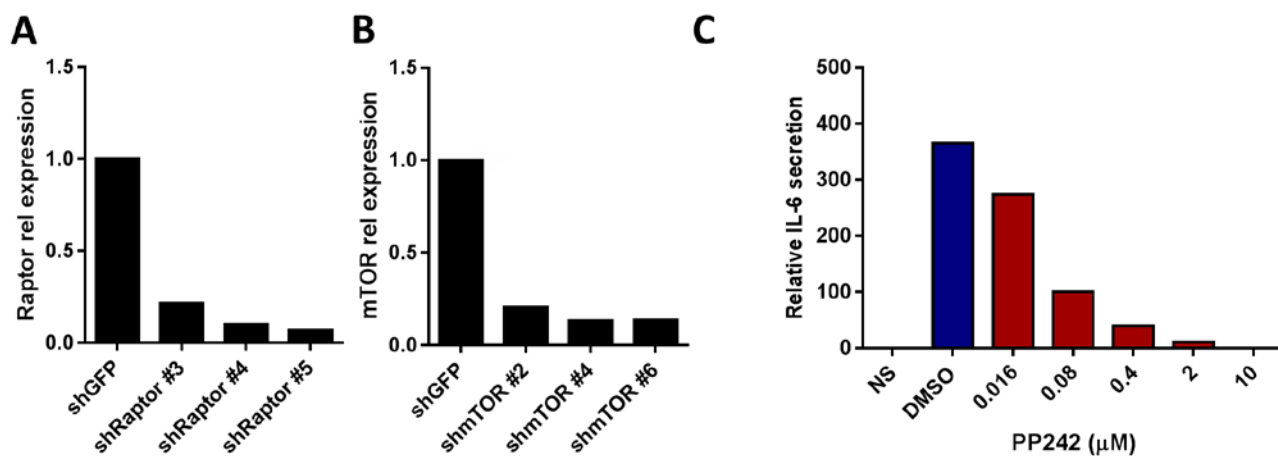

**Supplementary Figure 2** The SASP is mTOR dependent. (A) HCA2 cells were infected with lentiviruses expressing shRNAs against GFP (shGFP; control) or one of three different shRNAs against raptor. Raptor transcript levels were measured and are shown relative the level in cells expressing shGFP. (B) HCA2 cells were infected with lentiviruses expressing shGFP (control) or one of three different shRNA against mTOR. The relative transcript level of mTOR was measured. (C) Normal

HCA2 human foreskin fibroblasts, non-senescent (NS) or induced to senesce by IR, were treated with DMSO (control) or the indicated concentrations of the mTOR kinase inhibitor PP242. 7 days later, CM was collected and analyzed for IL-6 by ELISA. Values were normalized to the senescent cell level. For all panels, shown is one representative of two independent experiments, each with triplicate samples. Raw data could be found in Supplementary Table 4.

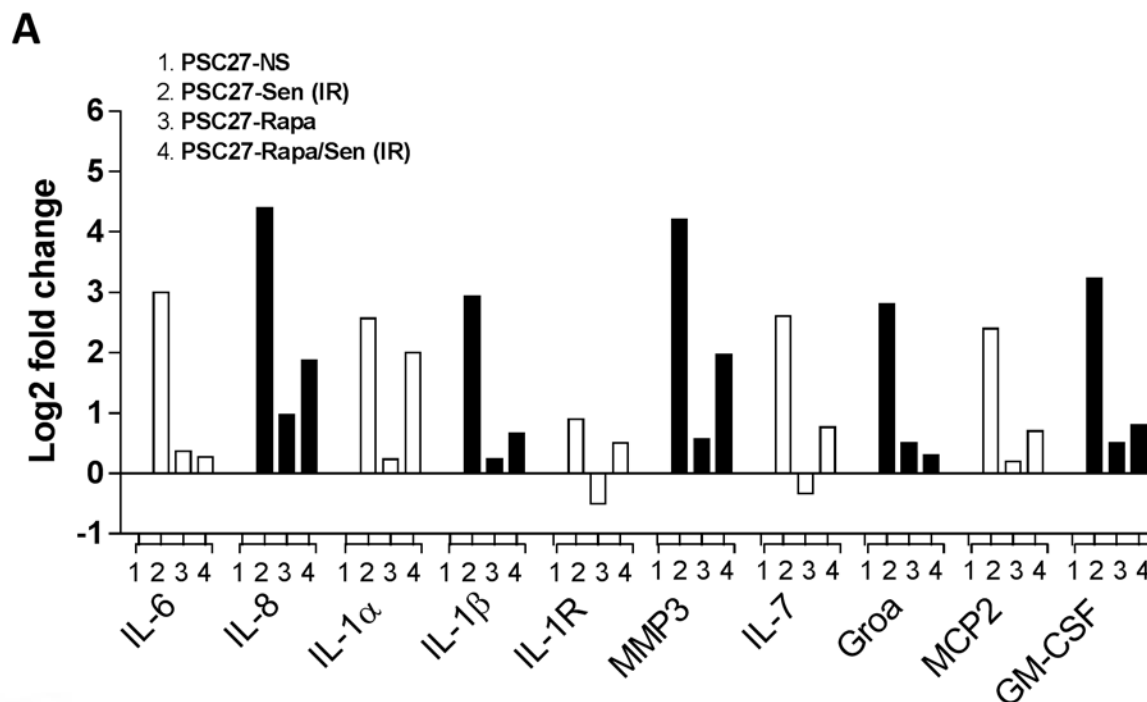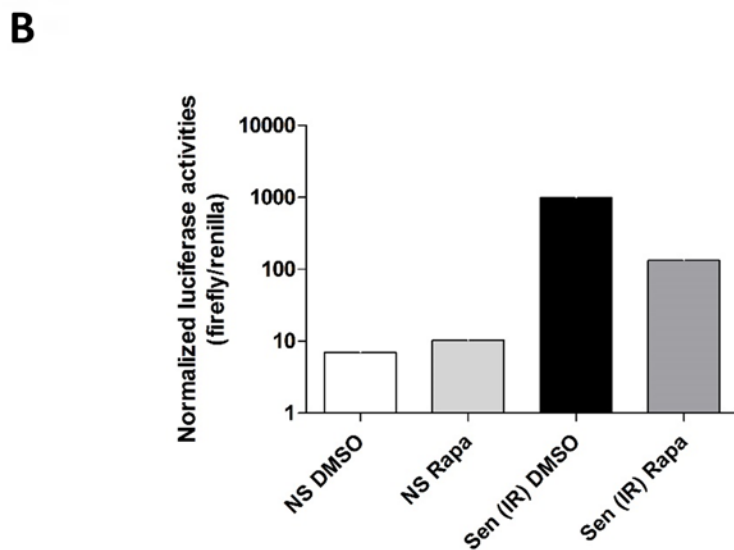

**Supplementary Figure 3** Rapamycin reduces SASP transcript levels and NF- $\kappa$ B activity in senescent prostate fibroblasts. (A) Transcript levels of indicated SASP factors were quantified by qRT-PCR in NS and Sen (IR) PSC27 fibroblasts with or without treatment with rapamycin for 7 days. (B)

NF- $\kappa$ B activity was measured after treatment with rapamycin for 7 days using a reporter assay. For all panels, shown is one representative of three independent experiments, each with triplicate samples. Raw data could be found in Supplementary Table 4.

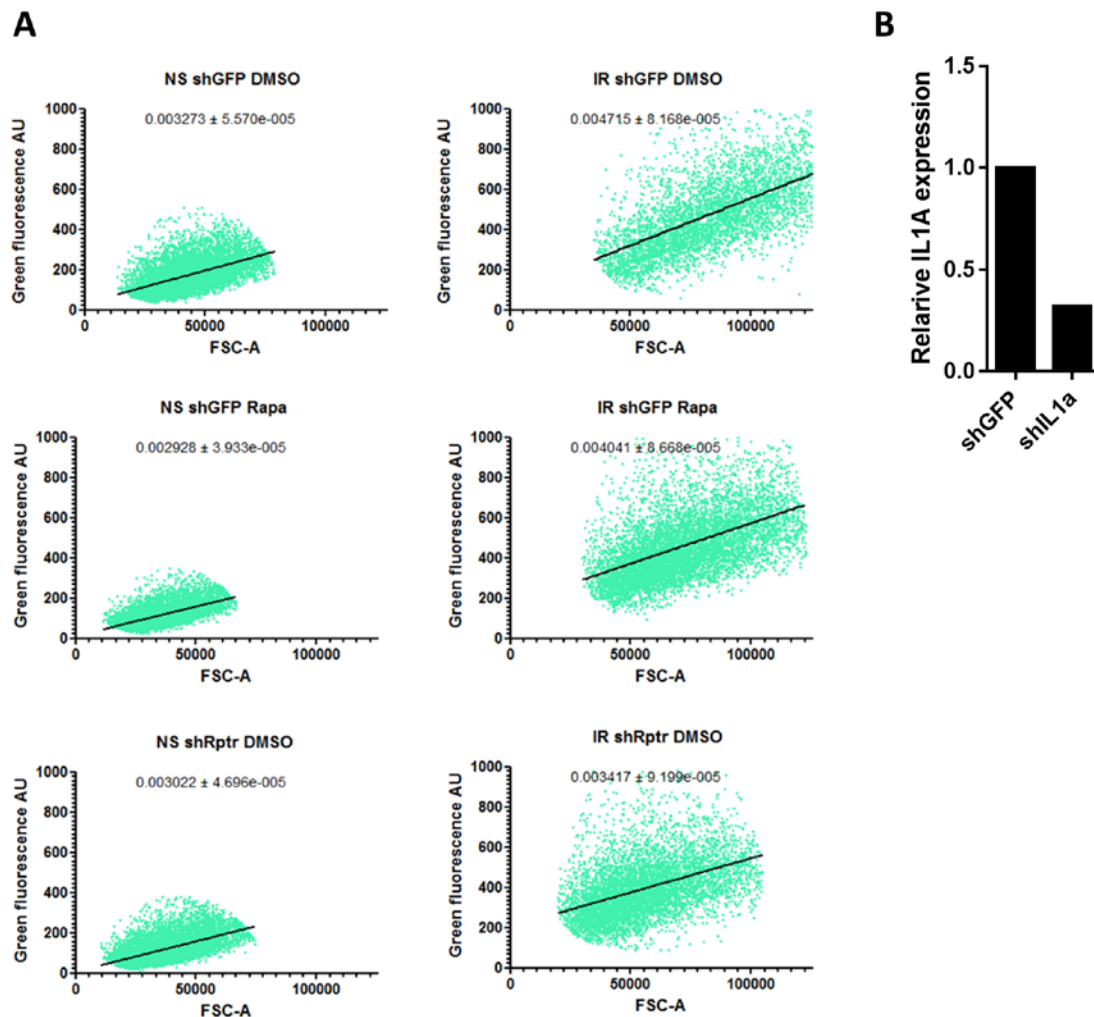

**Supplementary Figure 4** FACS analysis of cell surface IL-1 $\alpha$ . (A) Flow cytometry for cell surface IL-1 $\alpha$  was performed using NS or senescent (IR) HCA2 cells expressing shRNAs against GFP or raptor and treated with DMSO or rapamycin and a FITC-tagged antibody. Slope of a trend-line of fluorescence over forward scattering (FSC) was determined to discriminate fluorescence intensity from the effect of cell size (shown

is the result of one of two independent experiments, 10,000 cells were counter before gating). (B) HCA2 cells were infected with a lentivirus expressing shRNA against IL-1 $\alpha$  and the relative IL-1 $\alpha$  mRNA level was measured. Shown is one representative of two independent experiments, each with triplicate samples. Raw data could be found in Supplementary Table 4.

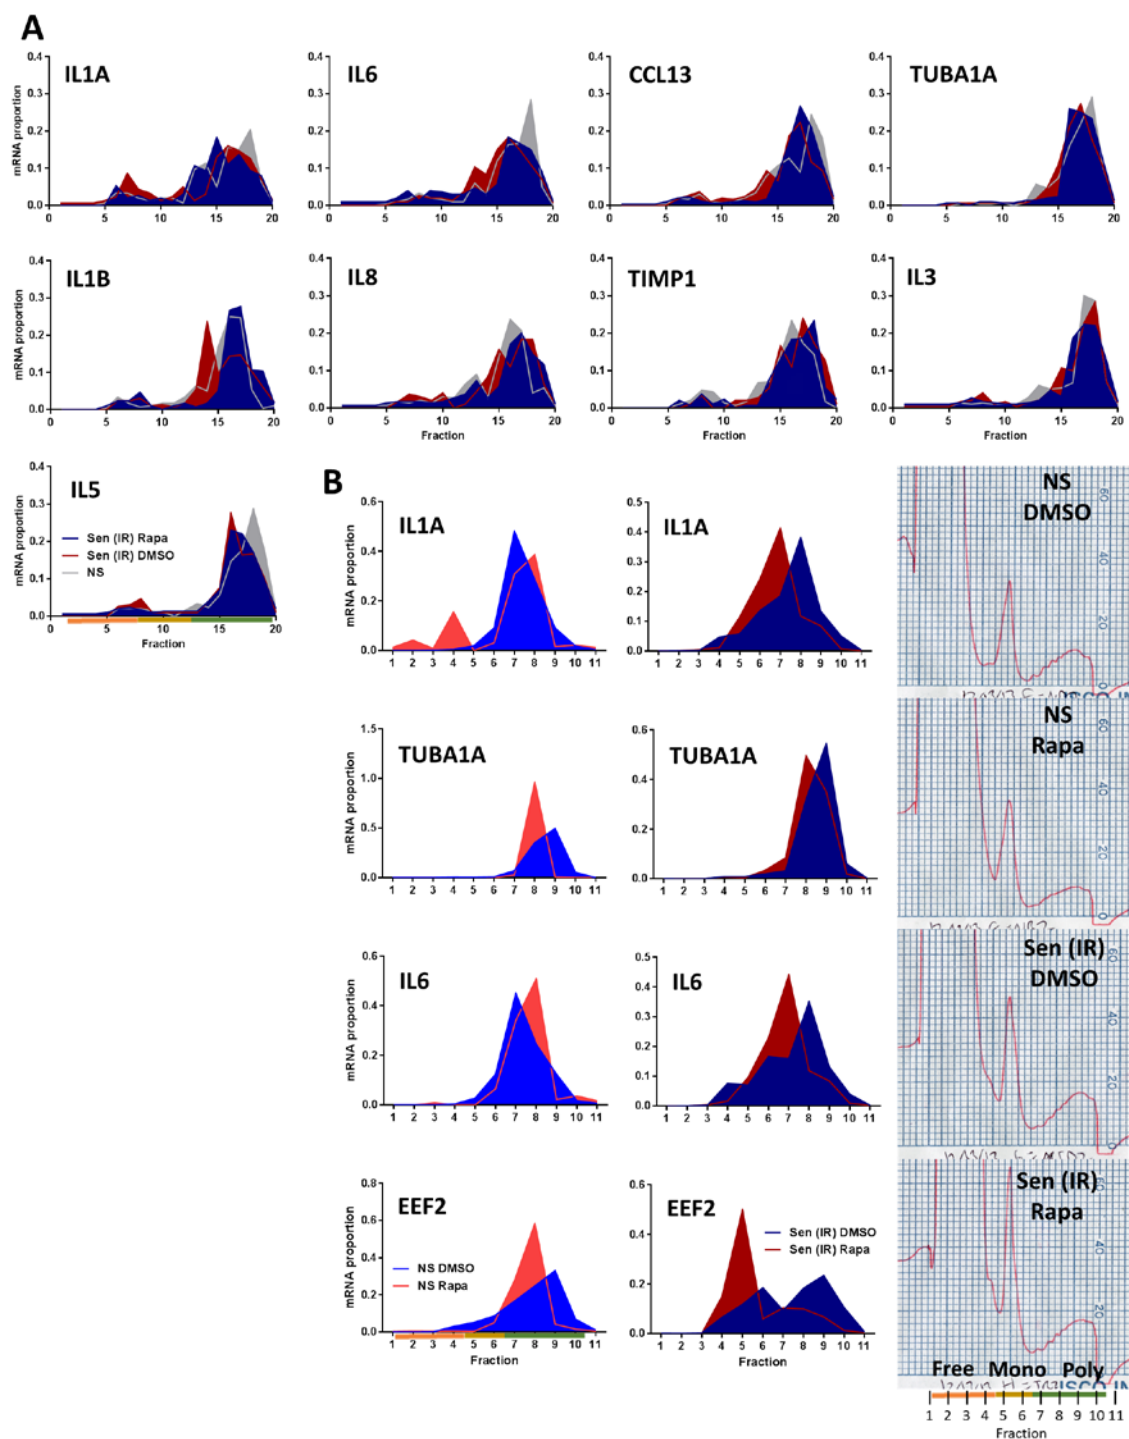

**Supplementary Figure 5** Translation status of various transcripts after rapamycin treatment. (A) After IR, senescent (Sen (IR)) HCA2 cells were treated for 1 day with rapamycin or DMSO followed by 1 day in serum-free media, after which cells were harvested and mRNA collected for polysome profiling. qPCR was performed on each fraction for IL1A, IL1B, IL6, IL8, IL3, IL5, TIMP1, CCL13 and TUBA1A mRNA (one representative experiment is shown). Fractions 1-7: Free RNA; 8-12: 40-60S; 13-20: polysomes. (B) NS or senescent (Sen (IR)) HCA2 cells were cultured for

7 days and then treated with DMSO or rapamycin for 4 hours, after which cells were harvested and mRNA collected for polysome profiling. qPCR was performed on each fraction for IL1A, TUBA1A, IL6, and EEF2 mRNA (one representative experiment is shown). Fractions 1-4: Free RNA; 5-6: 40-60S; 7-11: polysomes. Right panel: polysome profiles used to determine the translated fractions. All polysome profile data are based on at least two independent replicates; representative polysome traces are shown. Raw data could be found in Supplementary Table 4.

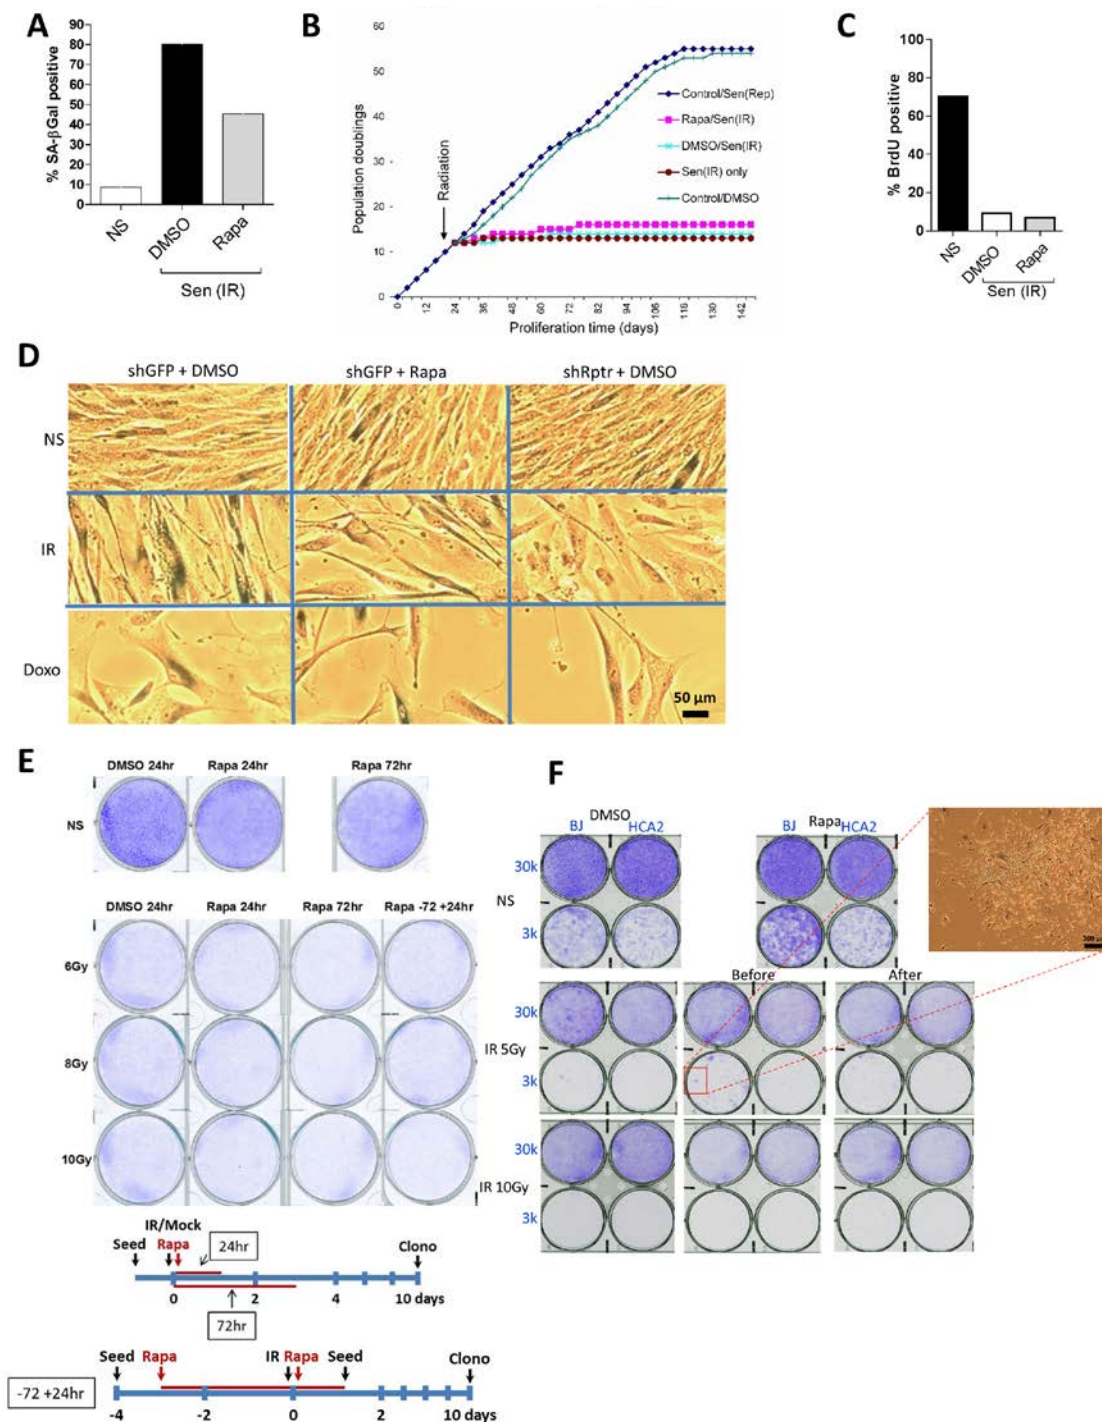

**Supplementary Figure 6** mTORC1 inhibition does not reverse the senescence growth arrest. (A) Effect of rapamycin on the number of senescent cells with detectable senescence-associated  $\beta$ -gal (SA- $\beta$ -gal) activity. (B) Proliferative potential of PSC27 fibroblasts was measured under the indicated culture conditions. (C) PSC27 cells, NS or made senescent by IR and treated with DMSO or rapamycin for 6 days, were pulsed with BrdU for 24 hours and the fraction that incorporated BrdU was determined by fluorescence microscopy. (D) SA- $\beta$ -gal expression was determined for the cell populations described in Figure 1 (one representative experiment is

shown). (E) Clonogenic assays were performed on HCA2 cells to compare the effects of rapamycin and DMSO on NS cells or cells irradiated at 6, 8 or 10 Gy (one representative experiment is shown). (F) BJ and HCA2 human fibroblasts were irradiated at 5 or 10 Gy and clonogenic assays performed in the presence of DMSO or rapamycin (one representative experiment is shown). For panels A, B and C, shown is one representative of three independent experiments, each with triplicate cell culture samples. For panel D, E and F, shown is one clonogenic assay experiment replicated once. Raw data could be found in Supplementary Table 4.

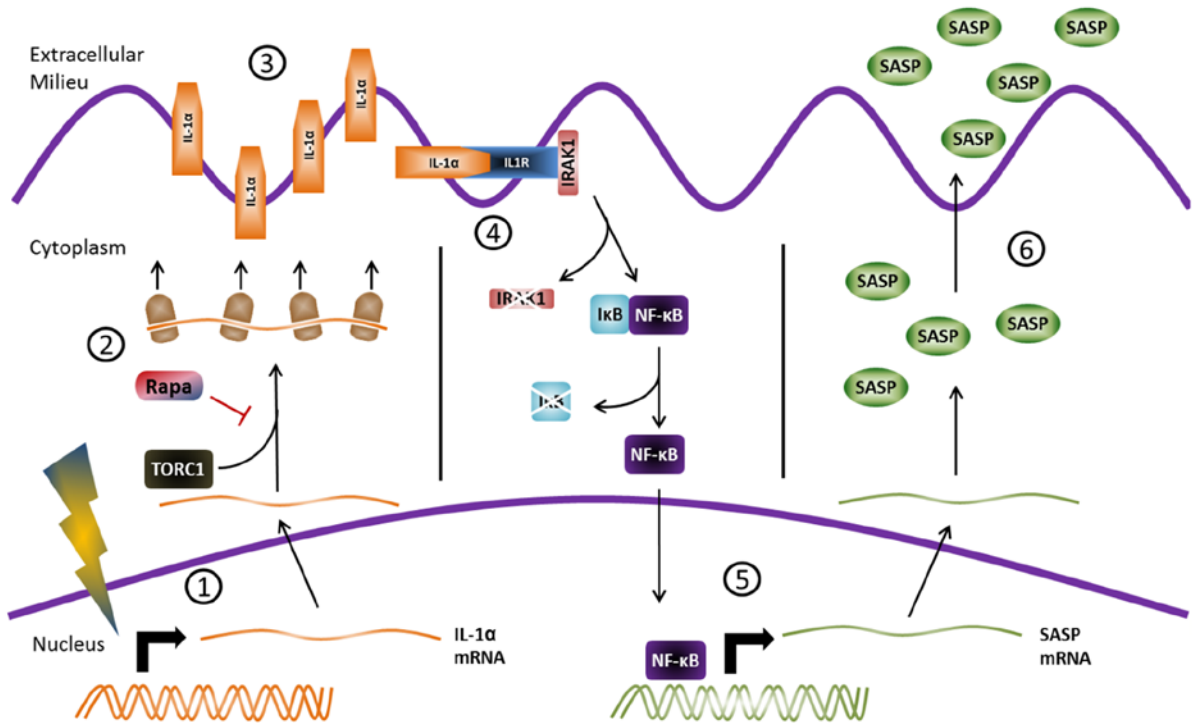

**Supplementary Figure 7** Model for SASP suppression by rapamycin. 1) Senescence signals activate IL-1 $\alpha$  transcription; 2) IL-1 $\alpha$  translation is mTOR-dependent and sensitive to rapamycin; 3) IL-1 $\alpha$  at the plasma membrane binds the IL1R; 4) IL1R occupancy activates

IL1R signaling; 5) IL1R signaling releases I $\kappa$ B, allowing NF- $\kappa$ B translocation to the nucleus, where it activates the transcription of genes encoding SASP factors; 6) SASP factors are transcribed, translated and secreted.

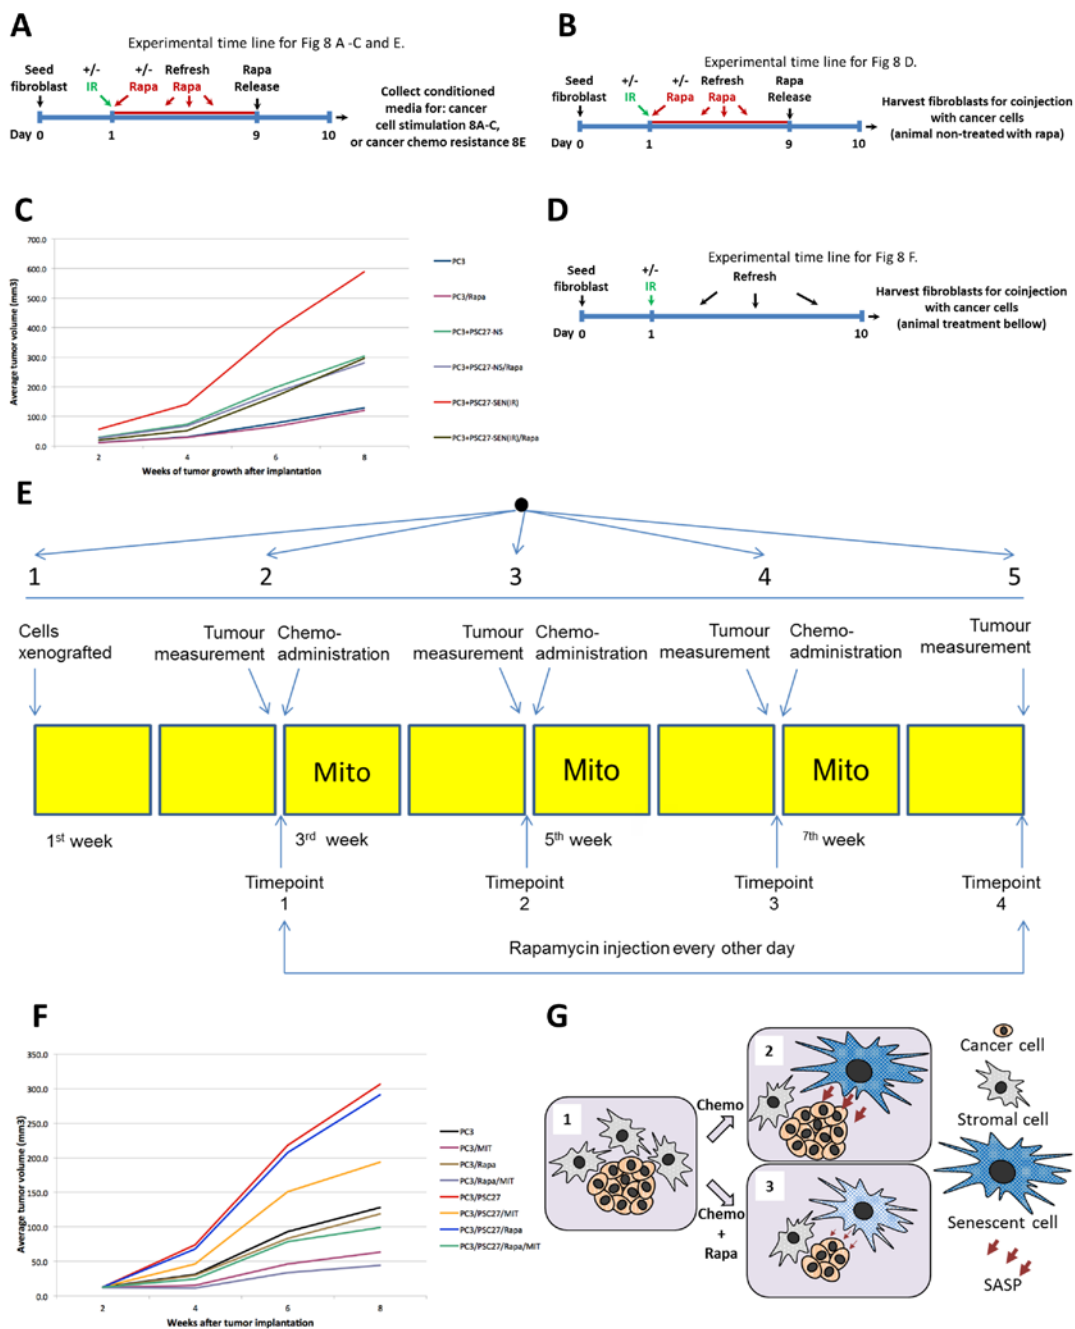

**Supplementary Figure 8** Rapamycin suppresses tumour cell growth. (A) Experimental timeline corresponding to Fig. 8A-C and E. (B) Experimental timeline corresponding to Fig. 8D. (C) PC3 prostate tumour cells were implanted subcutaneously with or without PSC27 prostate fibroblasts, and tumour sizes were measured every 2 weeks. PC3 cells were either exposed to DMSO or rapamycin *ex vivo* prior to implantation. PSC27 cells were exposed to ionizing radiation (IR), rapamycin (Rapa) or both *ex vivo* prior to implantation (n=8 per type of treatment). (D) Timeline corresponding to the cell culture experiment presented in Fig. 8F. (E) Timeline corresponding to the *in vivo* experiment presented in Fig. 8F. Scheduled timing of mitoxantrone given as 3 doses 2 weeks apart, and rapamycin given every 2 days, to SCID mice over the course of an 8 week regimen. The mice were engrafted with PC3 cells alone, or combined with either PSC27-NS (control

fibroblasts, without pre-treatment) or PSC27-Sen (IR) (fibroblasts pretreated with IR in culture). At the end of the treatment period, tumours were excised and volumes were determined, with 8-10 mice used per treatment arm. (F) PC3 prostate tumour cells were implanted subcutaneously with or without PSC27 prostate fibroblasts. After 2 weeks of tumour growth, mice were treated with vehicle (control), rapamycin (Rapa) and/or mitoxantrone (MIT). Tumour sizes were measured every 2 weeks (n=10 per type of treatment). (G) 1) Tumour cells (orange) are surrounded by stromal cells (grey); 2) Treatment with DNA-damaging chemotherapy induces senescence in the stroma (blue cell). The SASP (red arrows) from these senescent cells fuels the proliferation of the remaining tumour cells; 3) Rapamycin reduces the intensity of the SASPs induced by chemotherapy, and tumour cell proliferation is decreased.



Uncropped westerns for Fig 2D

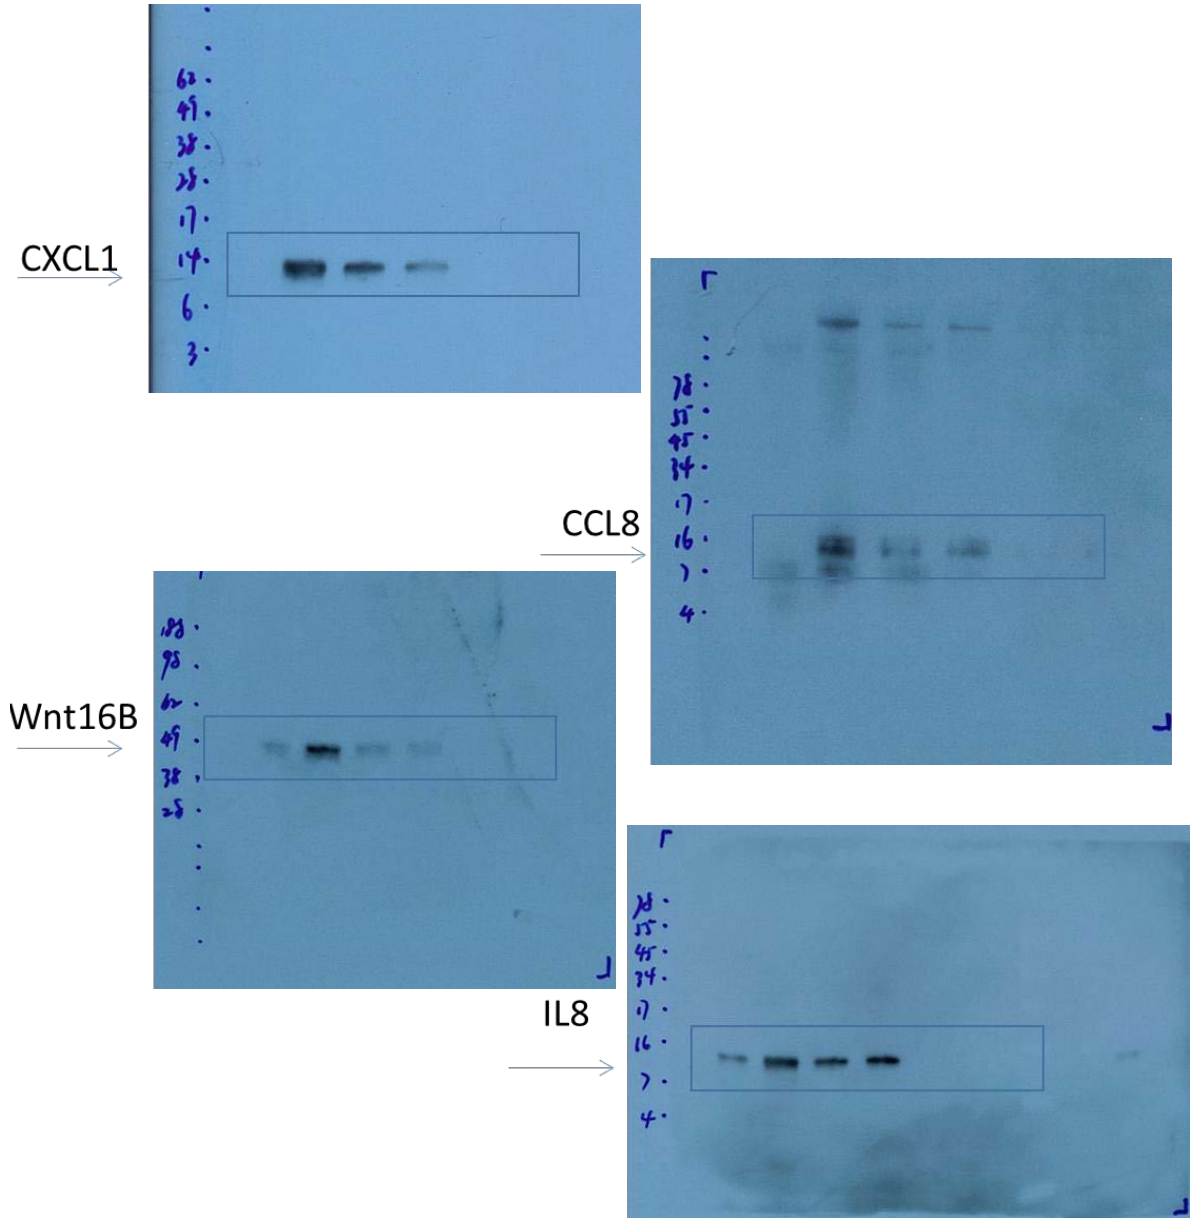

Supplementary Figure 9 Unprocessed western blots from experiments displayed in Figures 2D, 2E, 4C and 7C.

Uncropped westerns for Fig 2D

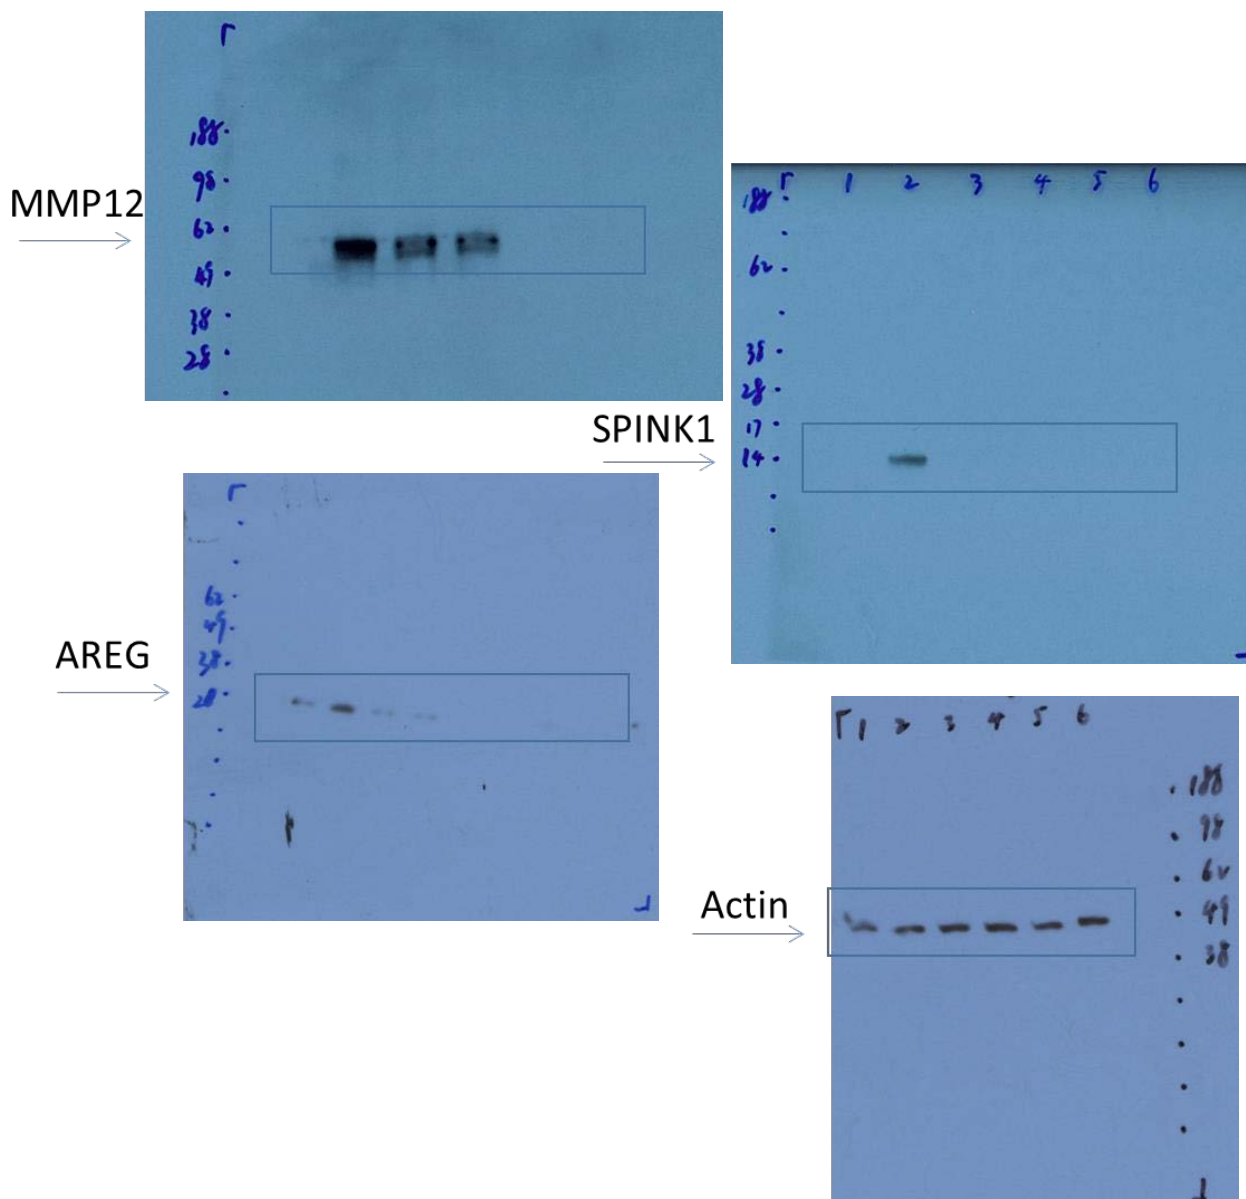

Uncropped westerns for Fig 2E

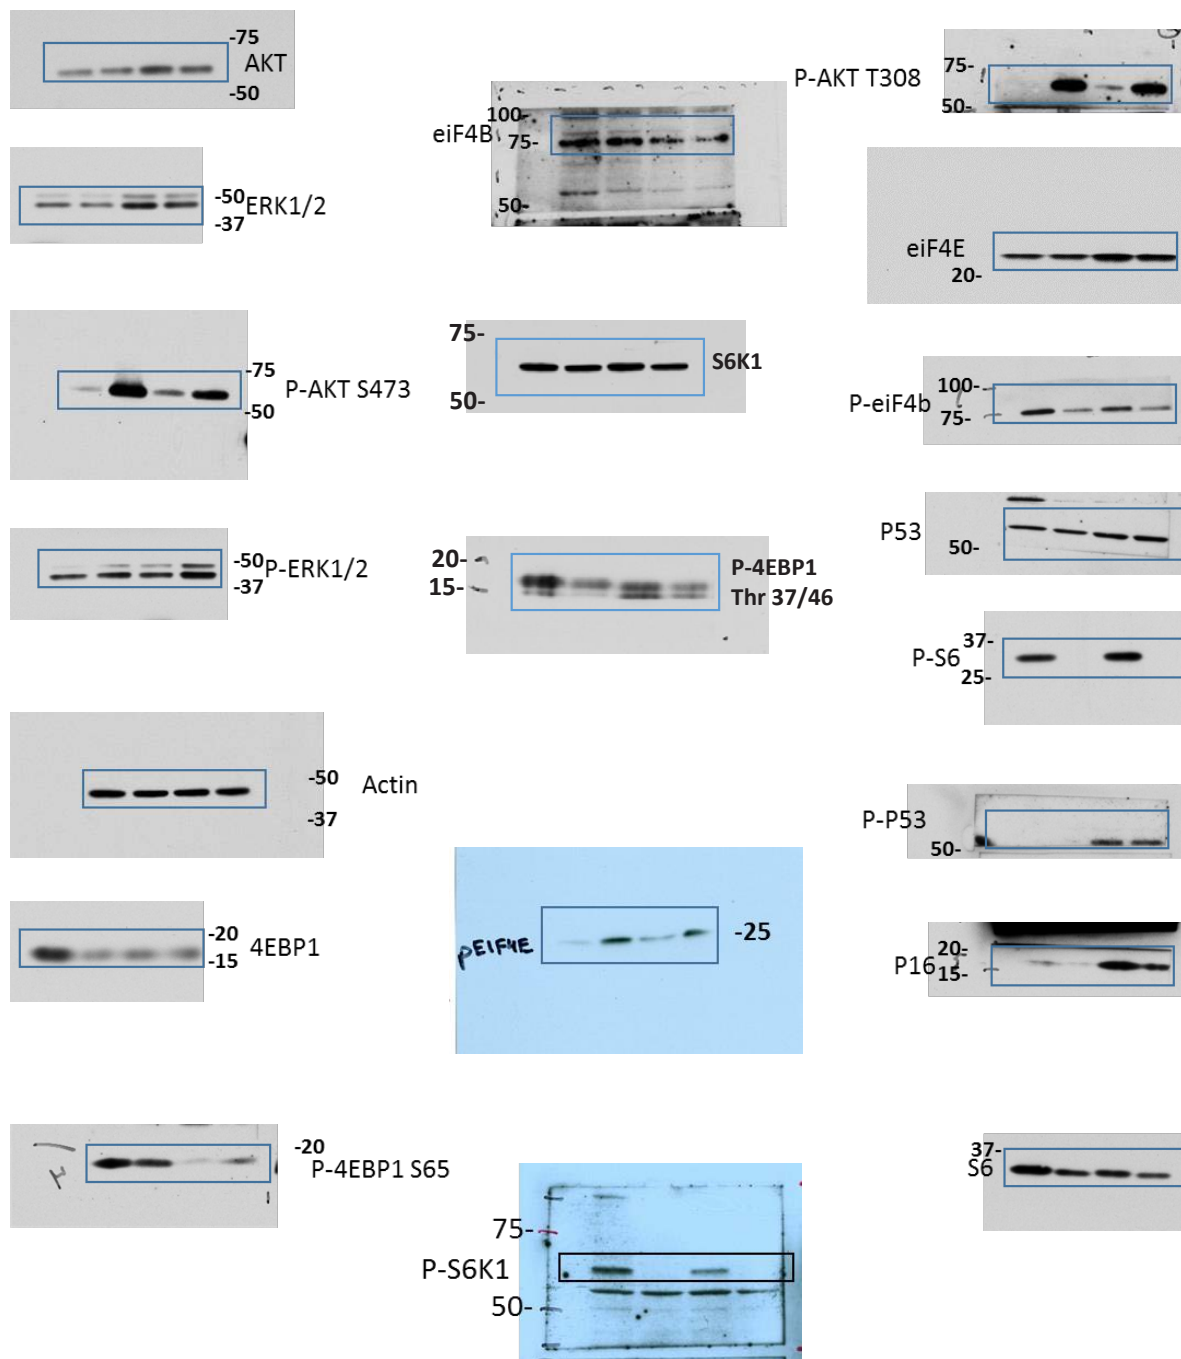



Uncropped westerns for figure 7C

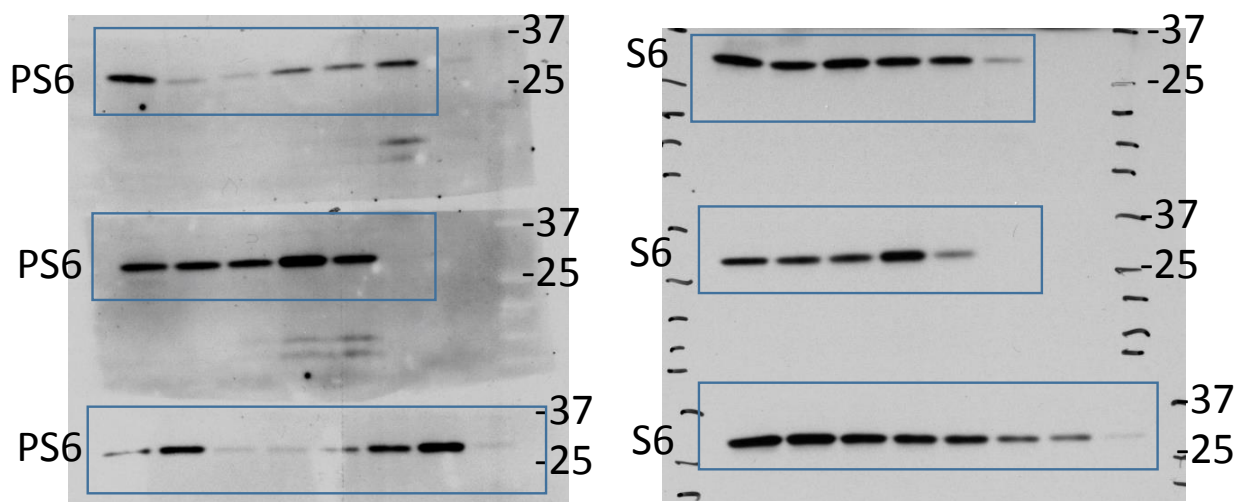

| Target                                       | Figure               | Source                   | Cat#          | Clone #       | Dilution |
|----------------------------------------------|----------------------|--------------------------|---------------|---------------|----------|
| IκBα                                         | Figure 4 C           | Cell Signaling           | 9242          | Polyclonal    | 1:250    |
| p70 S6 Kinase                                | Figure 2 E           | Cell Signaling           | 2708          | Polyclonal    | 1:500    |
| Phospho-p70 S6 Kinase (Thr389)               | Figure 2 E           | Cell Signaling           | 9234          | Polyclonal    | 1:1000   |
| Phospho-Akt (Thr308)                         | Figure 2 E           | Cell Signaling           | 2965          | Polyclonal    | 1:1000   |
| Phospho-Akt (Ser473)                         | Figure 2 E           | Cell Signaling           | 4060          | Polyclonal    | 1:1000   |
| Akt (pan)                                    | Figure 2 E           | Cell Signaling           | 4691          | Polyclonal    | 1:1000   |
| Phospho-p44/42 MAPK (Erk1/2) (Thr202/Tyr204) | Figure 2 E           | Cell Signaling           | 9101          | Polyclonal    | 1:1000   |
| p44/42 MAPK (Erk1/2)                         | Figure 2 E           | Cell Signaling           | 4695          | Polyclonal    | 1:1000   |
| Phospho-eIF4B (Ser422)                       | Figure 2 E           | Cell Signaling           | 3591          | Polyclonal    | 1:500    |
| eIF4B                                        | Figure 2 E           | Cell Signaling           | 3592          | Polyclonal    | 1:500    |
| Phospho-eIF4E (Ser209)                       | Figure 2 E           | Cell Signaling           | 9741          | Polyclonal    | 1:500    |
| eIF4E                                        | Figure 2 E           | Cell Signaling           | 9742          | Polyclonal    | 1:500    |
| Phospho-S6 Ribosomal Protein (Ser235/236)    | Figure 2E, 4C and 7C | Cell Signaling           | 4858          | Polyclonal    | 1:1000   |
| S6 Ribosomal Protein                         | Figure 2E, 4C and 7C | Cell Signaling           | 2217          | Polyclonal    | 1:1000   |
| Phospho-4E-BP1 (Thr37/46)                    | Figure 2 E           | Cell Signaling           | 2855          | Polyclonal    | 1:500    |
| Phospho-4E-BP1 (Ser65)                       | Figure 2 E           | Cell Signaling           | 9451          | Polyclonal    | 1:500    |
| 4E-BP1                                       | Figure 2 E           | Cell Signaling           | 9644          | Polyclonal    | 1:500    |
| Phospho-p53 (Ser15)                          | Figure 2 E           | Cell Signaling           | 9284          | Polyclonal    | 1:500    |
| p53                                          | Figure 2 E           | Oncogene                 | OP29          | Ab-3          | 1:1000   |
| p16                                          | Figure 2 E           | Santa Cruz Biotechnology | 56330         | JC8           | 1:500    |
| β-Actin                                      | Figure 2 E           | Sigma-Aldrich            | A2228         | AC-74         | 1:5000   |
| IRAK-1                                       | Figure 4 C           | Santa Cruz Biotechnology | 5288          | F4            | 1:500    |
| CXCL1                                        | Figure 2 D           | R & D Systems            | MAB275        | Clone 20326   | 1:500    |
| CCL8                                         | Figure 2 D           | R & D Systems            | AF-281-NA     | Polyclonal    | 1:400    |
| WNT16B                                       | Figure 2 D           | BD Pharmingen            | 552595        | clone F4-1582 | 1:1000   |
| IL8                                          | Figure 2 D           | Epitomics                | 1856-1        | Clone EP117Y  | 1:300    |
| MMP-12                                       | Figure 2 D           | Santa Cruz Biotechnology | sc-30072      | polyclonal    | 1:500    |
| SPINK1                                       | Figure 2 D           | Abnova                   | H00006690-M01 | clone 4D4     | 1:250    |
| AREG                                         | Figure 2 D           | Abcam                    | ab33558       | polyclonal    | 1:500    |
| Actin                                        | Figure 2 D           | Santa Cruz Biotechnology | SC-1616       | polyclonal    | 1:1000   |

Supplementary Table 1 shRNA list.

| Product   | id | Figure                                         | Source and cat#                 | Antisense Sequence 5'-3' |
|-----------|----|------------------------------------------------|---------------------------------|--------------------------|
| shGFP     | NA | various figures                                | Open Biosystems #RHS4459        | NA                       |
| shRaptor  | 3  | Figure 2A and S2A                              | Open Biosystems #TRCN0000332954 | TACACGGAGATGTAGTAGTCG    |
| shRaptor  | 4  | Figure 2A and S2A                              | Open Biosystems #TRCN0000221531 | ATACGACCTCATAATCCTTTC    |
| shRaptor  | 5  | Figure 2A, 4A, 6F, 6G, S2A, S6D, S6E, S6F, S6G | Open Biosystems #TRCN0000332886 | ATTGTAGTGAAGAGGACTCG     |
| shmTOR    | 2  | Figure 2A and S2B                              | Open Biosystems #TRCN0000038675 | AATTCTCCTATTGTTGCCAGG    |
| shmTOR    | 4  | Figure 2A and S2B                              | Open Biosystems #TRCN0000038677 | AAAGAATGAATAGATTCTGGC    |
| shmTOR    | 6  | Figure 2A and S2B                              | Open Biosystems #TRCN0000221542 | AATATATTCTTCAACAGCAGC    |
| siScrambl | NA | Figure 2 C, D                                  | Open Biosystems / NA            | ACTACCGTTGTATAGGTGTT     |
| siS6K     | NA | Figure 2 C, D                                  | Cell Signaling #6568            | CTCAGTGAGAGTGCCAAACCAA   |
| shIL1A    | NA | Figure 4B, 6F, S4A, S4B, S6D                   | Open Biosystems #TRCN0000059208 | GCCCTCAATCAAAGTATAATT    |
| shIL-6    | 1  | Figure 6F, 6G, S6D                             | NA                              | TGATCCAGTTCCTGCAGAA      |
| shIL-6    | 2  | Figure 6F, 6G, S6D                             | NA                              | GAACCTATGTTGTTCTCTA      |
| shRelA    | NA | Figure 6F, 6G, S6D                             | Open Biosystems #TRCN0000014687 | TAGGCGAGTTATAGCCTCAGG    |

**Supplementary Table 2** Antibodies used for western blotting.

| target | Figure                           | UPL Probe# | Forward primer 5'-3'    | Reverse primer 5'-3'    |
|--------|----------------------------------|------------|-------------------------|-------------------------|
| IL6    | Figure 3A, 3B, 5A, S5A, S5B, S6D | 45         | GCCCAGCTATGAACTCCTTCT   | GAAGGCAGCAGGCAACAC      |
| IL8    | Figure 3A, 3B, 5A, S5A           | 72         | AGACAGCAGAGCACACAAGC    | ATGGTTCCTCCGGTGGT       |
| IL1A   | Figure 3A, 3B, 5A, S5A, S5B      | 6          | GGTTGAGTTTAAGCCAATCCA   | TGCTGACCTAGGCTTGATGA    |
| IL1B   | Figure 3A, 3B, 5A, S5A           | 78         | CTGCTCGCGTGTGAAAGA      | TTGGGTAATTTTTGGGATCTACA |
| CCL13  | Figure 3A, 3B, 5A, S5A           | 40         | ACCTTCAACATGAAAGTCTCTGC | GGACGTTGAGTGCATCTGG     |
| TIMP1  | Figure 3A, 3B, 5A, S5A           | 76         | GGGCTCACCAAGACTACA      | TGCAGGGGATGGATAAACA     |
| IL3    | Figure 3A, 3B, 5A, S5A           | 60         | TTGCCTTTGCTGGACTTCA     | CTGTTGAATGCCTCCAGGTT    |
| IL5    | Figure 3A, 3B, 5A, S5A           | 25         | GGTTTGTGCAAGCAAGAT      | TCTTGGCCCTCATTCTCACT    |
| CXCL1  | Figure 3A                        | 52         | TCCTGCATCCCCATAGTTA     | CTTCAGGAACAGCCACCAGT    |
| CXCL2  | Figure 3A                        | 69         | CCCATGGTTAAGAAAATCATCG  | CTTCAGGAACAGCCACCAAT    |
| CCL2   | Figure 3A                        | 40         | AGTTCCTGCCGCCCTTCT      | GTGACTGGGGCATTGATTG     |
| TUBA1A | Figure 3A, 3B, 5A, S5A, S5B      | 58         | CTTCGTCTCCGCCATCAG      | TTGCCAATCTGGACACCA      |
| mTOR   | Figure S2 B                      | 53         | TCATCAAACAAGCGACATCC    | GGGCCTCAGTTACCAGAA      |
| Raptor | Figure S2 A                      | 45         | AGACACACCTGGCCCTCA      | TGTCCTGCCTTGTACGTC      |
| EEF2   | Figure S5B                       | 25         | CTGGAGATCTGCCTGAAGGA    | GAGACGACCGGGTCAGATT     |
| IL6    | Figure S3A                       | NA         | TACCCCAAGGAGAAGATTCC    | TTTTCTGCCAGTGCCTCTTT    |
| IL8    | Figure S3A                       | NA         | GTGCAGTTTTGCCAAGGAGT    | CTCTGCACCCAGTTTTCTTT    |
| IL1A   | Figure S3A                       | NA         | AATGACGCCCTCAATCAAAG    | TGGGATCTCAGGCATCTCC     |
| IL1B   | Figure S3A                       | NA         | GGGCCTCAAGGAAAAGAATC    | TTCTGCTTGAGAGGTGCTGA    |
| IL-1R1 | Figure S3A                       | NA         | ATTGATGTTCTGCCCTGTCC    | CCTCCACCTTAGCAGGAACA    |
| MMP3   | Figure S3A                       | NA         | GCAGTTTGCTCAGCCTATCC    | GAGTGTCCGAGTCCAGCTTC    |
| IL7    | Figure S3A                       | NA         | CGCAAGTTGAGGCAATTTCT    | CTCTTTGTTGGTTGGGCTTC    |
| CXCL1  | Figure S3A                       | NA         | AGGGAAATCACCCCAAGAAC    | TGGATTGTCACTGTTTCAGCA   |
| CCL8   | Figure S3A                       | NA         | TCACTGCTGCTTTAACGTG     | ATCCCTGACCCATCTCTCT     |
| GM-CSF | Figure S3A                       | NA         | ATGTGAATGCCATCCAGGAG    | AGGGCAGTGTGCTTGTAGT     |
| RPL13A | Figure S3A                       | NA         | GTACGCTGTGAAGGCATCAA    | CGCTTTTTCTGTCTGAGGG     |

Supplementary Table 3 Primers and probes list.



**Supplementary Table 4** Statistics source data.
